# Supplementary material for: Slip of a liquid crystal droplet rotator in viscous fluids
Source: Royal Society of Chemistry journal article supplement (doi:10.1039/d3sm01028g), 2023-11-25
Supplement: d3sm01028g2.pdf [file d3sm01028g2.pdf]

**Supplementary Information for**  
**“Slip of a liquid crystal droplet rotator in viscous fluids”**

Keita Saito<sup>1</sup> and Yasuyuki Kimura<sup>2\*</sup>

<sup>1,2</sup>Department of Physics, School of Science, Kyushu University, 819-0395 Fukuoka, Japan

E-mail addresses: <sup>1</sup> [saitodes3110des@gmail.com](mailto:saitodes3110des@gmail.com), <sup>2</sup> [kimura@phys.kyushu-u.ac.jp](mailto:kimura@phys.kyushu-u.ac.jp)

\*Corresponding author

## Supplementary movie

Movie S1. Time-lapse movie of a rotating NLC droplet in  $C_m = 20$  wt %. The laser power used was 18.8 mW, and scale bar is 5  $\mu\text{m}$ .

## An image of the fringe pattern of an NLC droplet

Supplementary Figure 1 is an image of an NLC droplet captured under the bright field for PIV analysis. The diffraction at the edge of a droplet induces a fringe pattern at the droplet surface. This overlaps the images of tracer particles and makes it difficult to measure the flow velocity correctly. The interrogation window size was 2.0  $\mu\text{m}$  for PIV analysis in this study. This makes it even more difficult to measure the flow velocity near the droplet surface.

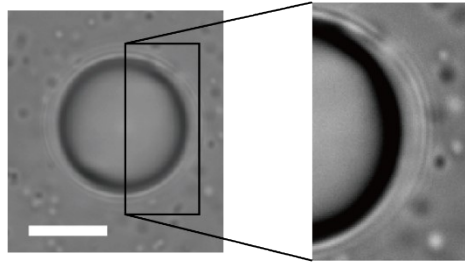

Supplementary Figure 1. Microscopic image of an NLC droplet. Scale bar: 5  $\mu\text{m}$ .

## Estimation of effective viscosity $\eta_{eff}$ from Brownian motion near the cell bottom.

We measured the Brownian motion of a tracer silica particle (radius  $a = 500$  nm, Micromod) near cell bottom. The mean squared displacement  $\Delta r^2$  (MSD) was calculated from the two-dimensional trajectory of the particle (Supplementary Figure 2). The MSD for a freely diffusing particle is written by,

$$\langle \Delta r(t)^2 \rangle = 4Dt, \quad (1)$$

where  $D$  is the diffusion constant and  $t$  is the elapsed time. The estimated value of  $D$  is  $8.9 \times 10^{-2} \mu\text{m}^2/\text{s}$  at  $C_m = 60$  wt %. The effective viscosity  $\eta_{eff}$  is calculated by Stokes-Einstein equation as,

$$\eta_{eff} = \frac{k_B T}{6\pi D a}, \quad (2)$$

where  $k_B$  is the Boltzmann constant,  $T$  is the absolute temperature and  $a$  is the particle radius. The estimated value of  $\eta_{eff}$  is larger than the literature value  $\eta_0$  due to the particle-wall interaction. The value of  $\eta_0$  and  $\eta_{eff}$  are listed in Table 1.

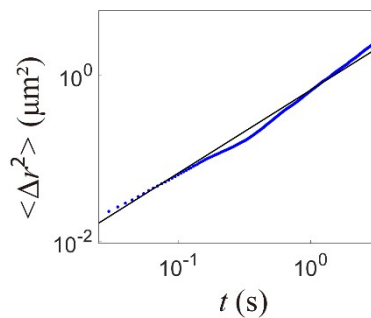

Supplementary Figure 2. Mean square displacement of a tracer particle in the aqueous glycerol solution of  $C_m = 50$  wt%. Blue dots: the measured values. Solid line: the best-fitted lines with Eqn (1).

The flow velocity measured by PIV were corrected by considering the reduction in velocity due to the wall effect.

| $C_m$ (wt%) | $\eta_0$ (mPa·s)@25°C [1] | $\eta_{eff}$ (mPa·s) |
|-------------|---------------------------|----------------------|
| 0           | 0.89                      | 0.92                 |
| 20          | 1.5                       | 1.8                  |
| 40          | 3.1                       | 3.5                  |
| 50          | 5.0                       | 6.2                  |
| 60          | 8.8                       | 9.8                  |

Supplementary table 1.  $\eta_0$  and  $\eta_{eff}$  at various  $C_m$ .

### Supplementary reference

1. N.-S. Cheng, *Ind. Eng. Chem. Res.*, 2008, **47**, 3285–3288.
